# Supplementary material for: N and Ti3+ co-doped 3D anatase TiO2 superstructures composed of ultrathin nanosheets with enhanced visible light photocatalytic activity
Source: Royal Society of Chemistry journal article supplement (doi:10.1039/c5ta05654c), 2015-01-01
Supplement: c5ta05654c1.pdf [file c5ta05654c1.pdf]

**Electronic Supplementary Information for:**

**N and Ti<sup>3+</sup> co-doped 3D anatase TiO<sub>2</sub> superstructures**

**composed of ultrathin nanosheets with enhanced visible light**

**photocatalytic activity**

**Guoliang Li,\* Jie Li, Gang Li and Guibin Jiang**

*State Key Laboratory of Environmental Chemistry and Ecotoxicology, Research Center for Eco-Environment Sciences, Chinese Academy of Sciences, P.O. Box 2871, Beijing 100085, P. R. China; E-mail: [glli@rcees.ac.cn](mailto:glli@rcees.ac.cn); Tel:8610-62849311.*

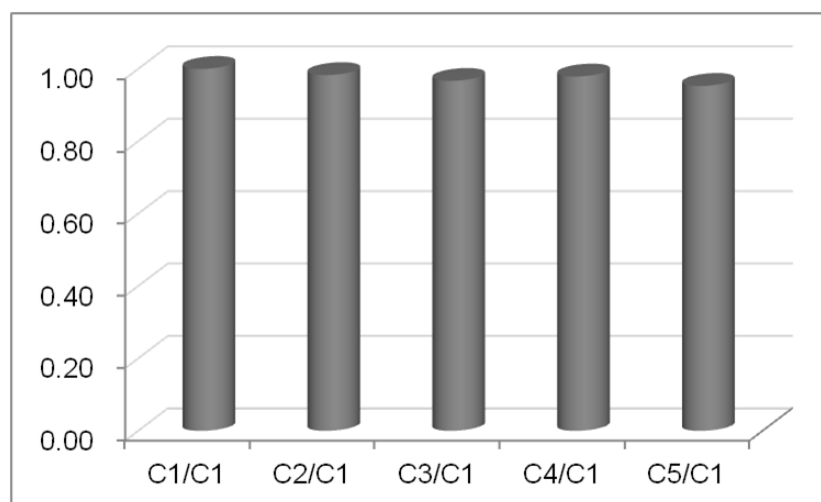

Fig. S1 Fig. 8 Cycling degradation efficiency of formic acid under visible light illumination ( $\lambda > 400$ ) catalyzed by as-prepared HCDT.

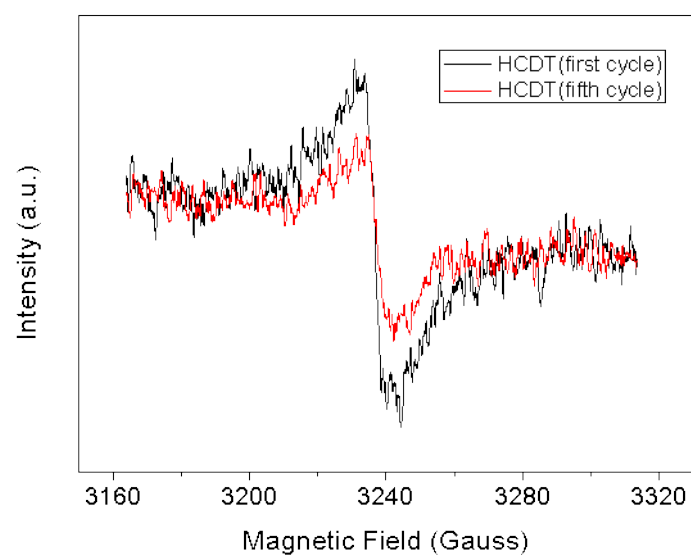

Fig. S2 Low temperature EPR of the HCDT and the corresponding washed sample after 5 cycles of photodegradation process.
